# Supplementary material for: Differential regulation of mRNAs and lncRNAs related to lipid metabolism in two pig breeds
Source: PubMed Central journal article supplement (PMC5675652; doi:10.18632/oncotarget.20978), 2017-09-18
Supplement: oncotarget-08-87539-s001.pdf [file oncotarget-08-87539-s001.pdf]

## Differential regulation of mRNAs and lncRNAs related to lipid metabolism in two pig breeds

### SUPPLEMENTARY MATERIALS

**Supplementary Table 1: Differentially expressed genes in subcutaneous adipose tissue between Laiwu and Large White pig.**

See Supplementary File 1

**Supplementary Table 2: Differentially expressed lncRNAs in subcutaneous adipose tissue between Laiwu and Large White pig.**

See Supplementary File 2

**Supplementary Table 3: Gene ontology enrichment analysis of differentially expressed genes.**

See Supplementary File 3

**Supplementary Table 4: KEGG pathway enrichment analysis of differentially expressed genes.**

See Supplementary File 4

**Supplementary Table 5: Protein-protein interaction network of differently expressed genes related to lipid metabolism.**

See Supplementary File 5

**Supplementary Table 6: Co-expression analysis of differentially expressed lncRNAs and mRNAs.**

See Supplementary File 6

**Supplementary Table 7: Co-expression network construction of differentially expressed lncRNAs and mRNAs related to lipid metabolism.**

See Supplementary File 7

**Supplementary Table 8: Cis-regulated target genes of differentially expressed lncRNAs.**

See Supplementary File 8

**Supplementary Table 9: Trans-regulated target genes of differentially expressed lncRNAs.**

See Supplementary File 9

**Supplementary Table 10: qRT-PCR validation of the differentially expressed genes.**

See Supplementary File 10
